# Supplementary material for: An electrochemically synthesized molecularly imprinted polymer for highly selective detection of breast cancer biomarker CA 15-3: a promising point-of-care biosensor
Source: Royal Society of Chemistry journal article supplement (doi:10.1039/d4ra02051k), 2024-01-01
Supplement: d4ra02051k1.pdf [file d4ra02051k1.pdf]

## Supporting Information

### Electrochemically Synthesized Molecularly Imprinted Polymer for Highly Selective Detection of Breast Cancer Biomarker CA 15-3: A Promising Point-of-Care Biosensor

Table S1 – Spectral features of two-peak of the D and G band

| Samples                               | D band | I <sub>D</sub> | G band | I <sub>G</sub> | I <sub>D</sub> /I <sub>G</sub> |
|---------------------------------------|--------|----------------|--------|----------------|--------------------------------|
| Pre-treatment                         | 1356   | 1496.88        | 1586   | 1657.60        | 0.90                           |
| MIP                                   | 1355   | 2259.15        | 1583   | 2266.07        | 1.00                           |
| NIP                                   | 1357   | 2940.55        | 1585   | 3420.36        | 0.86                           |
| MIP after treatment with proteinase k | 1355   | 3819.17        | 1583   | 3703.42        | 1.03                           |

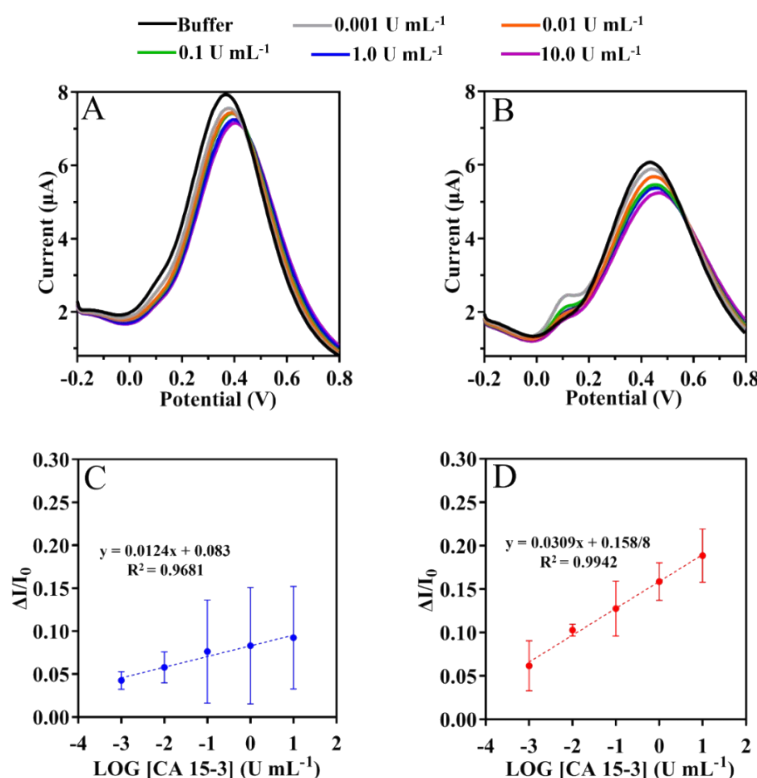

2

Figure S1– SWV measurements of the last stabilization in buffer and increasing standard concentrations of CA 15-3 in NIP (A) and MIP (B) prepared in PB buffer pH 5.8. Images C and D show the calibration curve of the normalized current response against the logarithmic concentration of CA 15-3 for NIP and MIP, respectively.

**Table S2** – Analytical performance of sensor reported in the literature for the detection of CA 15-3.

| <b>Sensing Approach</b> | <b>Transducer</b> | <b>Response Range U mL<sup>-1</sup></b> | <b>Limit of detection U mL<sup>-1</sup></b> | <b>Reference</b> |
|-------------------------|-------------------|-----------------------------------------|---------------------------------------------|------------------|
| Sensor MIP              | Electrochemical   | 0.25-10                                 | 0.05                                        | [1]              |
| Sensor MIP              | Electrochemical   | 0.10-100                                | 0.10                                        | [2]              |
| Sensor MIP              | Electrochemical   | 5-50                                    | 1.50                                        | [3]              |
| Sensor MIP              | Electrochemical   | 5-35                                    | 1.16                                        | [4]              |
| Sensor MIP              | Electrochemical   | 0.001-10                                | 0.000909                                    | This Work        |

## References

- [1]. Gomes R.S., F.T.C. Moreira, R. Fernandes and M.G.F. Sales, PLOS ONE, 2018, **13**, 1-19.
- [2]. Ribeiro J.A., C.M. Pereira, A.F. Silva and M.G.F. Sales, Biosensors and Bioelectronics, 2018, **109**, 246-254.
- [3]. Pacheco J.G., M.S.V. Silva, M. Freitas, H.P.A. Nouws and C. Delerue-Matos, Sensors and Actuators B: Chemical, 2018, **256**, 905-912.
- [4]. Oliveira, A. E. F, A. C. Pereira, L. F. Ferreira, Talanta,2023, **252**, 1-14.
